# Supplementary material for: Serum and Adipose Dipeptidyl Peptidase 4 in Cardiovascular Surgery Patients: Influence of Dipeptidyl Peptidase 4 Inhibitors
Source: MDPI journal article supplement (doi:10.3390/jcm11154333), 2022-07-26
Supplement: s1 [file s1]

Supplementary Table S1. Characteristics of patients with and without atherosclerotic disease

|                                                        | Atherosclerotic<br>disease <sup>a</sup> (-) | Atherosclerotic<br>disease <sup>a</sup> (+) | p-value <sup>c</sup>   | Effect<br>size <sup>e</sup> |
|--------------------------------------------------------|---------------------------------------------|---------------------------------------------|------------------------|-----------------------------|
| Patients, Number                                       | 23                                          | 17                                          |                        |                             |
| Male, n (%)                                            | 16 (69.6)                                   | 9 (52.9)                                    | 0.283                  |                             |
| Age, years                                             | 64.2 ± 15.2                                 | 71.9 ± 10.0                                 | 0.062 <sup>d</sup>     |                             |
| BMI, kg/m <sup>2</sup>                                 | 24.8 ± 5.3                                  | 24.6 ± 2.6                                  | 0.914 <sup>d</sup>     |                             |
| Diagnosis                                              |                                             |                                             |                        |                             |
| NYHA                                                   | 2.1 ± 1.2                                   | 2.1 ± 1.2                                   | 1.000 <sup>d</sup>     |                             |
| ECG                                                    |                                             |                                             |                        |                             |
| Atrial fibrillation                                    | 10 (43.5)                                   | 1 (5.9)                                     | 0.008 <sup>**</sup>    |                             |
| Comorbidity                                            |                                             |                                             |                        |                             |
| Diabetes, n (%)                                        | 5 (21.7)                                    | 10 (58.8)                                   | 0.017 <sup>*</sup>     |                             |
| DPP-4 inhibitors, n (%)                                | 4 (17.4)                                    | 6 (35.3)                                    | 0.196                  |                             |
| Hypertension, n (%)                                    | 16 (69.6)                                   | 13 (76.5)                                   | 0.629                  |                             |
| Dyslipidemia, n (%)                                    | 6 (26.1)                                    | 11 (64.7)                                   | 0.015 <sup>*</sup>     |                             |
| Smoking, n (%)                                         | 3 (13.0)                                    | 2 (11.8)                                    | 0.904                  |                             |
| Hemodialysis, n (%)                                    | 2 (8.7)                                     | 2 (11.8)                                    | 0.749                  |                             |
| Fasting blood glucose, mg/dL                           | 110.0 ± 26.7                                | 128.2 ± 39.3                                | 0.173 <sup>d</sup>     |                             |
| Creatinine, mg/dL                                      | 1.27 ± 1.27                                 | 1.22 ± 1.31                                 | 0.448 <sup>d</sup>     |                             |
| eGFR, mL/min/1.73 m <sup>2</sup>                       | 61.3 ± 23.6                                 | 63.6 ± 27.1                                 | 0.665 <sup>d</sup>     |                             |
| Total cholesterol <sup>b</sup> , mg/dL                 | 178.3 ± 37.0                                | 172.3 ± 43.6                                | 0.944 <sup>d</sup>     |                             |
| High-Density Lipoprotein<br>cholesterol, mg/dL         | 52.7 ± 12.8                                 | 50.5 ± 21.2                                 | 0.277 <sup>d</sup>     |                             |
| Low-Density Lipoprotein<br>cholesterol, mg/dL          | 98.3 ± 27.5                                 | 97.9 ± 31.3                                 | 0.914 <sup>d</sup>     |                             |
| Triglycerides, mg/dL                                   | 112.0 ± 71.9                                | 117.9 ± 64.1                                | 0.432 <sup>d</sup>     |                             |
| Triglycerides/ High-Density<br>Lipoprotein cholesterol | 2.2 ± 1.5                                   | 2.7 ± 1.7                                   | 0.277 <sup>d</sup>     |                             |
| C-reactive protein, mg/dL                              | 1.17 ± 2.07                                 | 0.65 ± 1.21                                 | 0.371 <sup>d</sup>     |                             |
| BNP, pg/mL                                             | 313.8 ± 411.6                               | 351.7 ± 570.9                               | 0.978 <sup>d</sup>     |                             |
| Hemoglobin A1c, %                                      | 6.01 ± 0.9                                  | 6.6 ± 0.9                                   | 0.024 <sup>*d</sup>    |                             |
| TTE                                                    |                                             |                                             |                        |                             |
| AoD, mm                                                | 35.2 ± 9.0                                  | 28.6 ± 4.7                                  | 0.004 <sup>**d</sup>   |                             |
| LAD, mm                                                | 45.5 ± 9.5                                  | 42.5 ± 9.1                                  | 0.121 <sup>d</sup>     |                             |
| EF, %                                                  | 55.8 ± 10.0                                 | 58.1 ± 9.5                                  | 0.665 <sup>d</sup>     |                             |
| Number of coronary artery<br>lesions, vessel disease   | 0                                           | 1.8 ± 1.3                                   | <0.001 <sup>***d</sup> |                             |
| Serum levels                                           |                                             |                                             |                        |                             |
| Adiponectin, µg/ml                                     | 7.7 ± 6.6                                   | 11.5 ± 23.2                                 | 0.255 <sup>d</sup>     | γ=0.15                      |

|                             |                 |                 |                      |        |
|-----------------------------|-----------------|-----------------|----------------------|--------|
| Leptin <sup>b</sup> , pg/ml | 5440.2 ± 5557.5 | 6081.1 ± 6691.3 | 0.978 <sup>d</sup>   | γ=0.06 |
| DPP-4 <sup>b</sup> , ng/ml  | 166.1 ± 50.3    | 180.0 ± 65.7    | 0.851 <sup>d</sup>   | γ=0.13 |
| DPP-4 activity, RFU/sec     | 3.8 ± 2.0       | 3.8 ± 1.2       | 0.808 <sup>d</sup>   | γ=0.02 |
| Subcutaneous adipose        |                 |                 |                      |        |
| DPP-4                       | 0.87 ± 0.58     | 1.52 ± 0.71     | 0.004 <sup>**d</sup> | γ=0.49 |
| Adiponectin                 | 1.55 ± 1.23     | 1.25 ± 0.87     | 0.289                | γ=0.13 |
| Epicardial adipose          |                 |                 |                      |        |
| DPP-4                       | 0.90 ± 0.62     | 0.80 ± 0.66     | 0.570 <sup>d</sup>   | γ=0.09 |
| Adiponectin                 | 0.56 ± 0.49     | 0.68 ± 0.57     | 0.273 <sup>d</sup>   | γ=0.12 |

The values are shown as mean ± SD. \* <0.05, \*\* <0.01, and \*\*\* <0.001. <sup>a</sup>Atherosclerotic disease includes ischemic heart disease and aortic valve stenosis. <sup>b</sup>Missing values in total cholesterol (n=1), leptin (n=10), and DPP-4 (n=4) were excluded. <sup>c</sup>Using Chi-square test or Fisher's exact test. <sup>d</sup>Using Mann–Whitney U test. <sup>e</sup>Effect size was calculated by γ (≥0.1: small, ≥0.3: medium, ≥0.5: large) for Mann–Whitney. DPP-4, dipeptidyl peptidase 4; SD, standard deviation; BMI, body mass index; NYHA, New York Heart Association; ECG, electrocardiogram; BNP, brain natriuretic peptide; eGFR, estimated glomerular filtration; TTE, transesophageal echocardiography; AoD, aortic root diameter; LAD, left atrial dimension; EF, ejection fraction; RFU/s, relative fluorescent units per seconds.
